1 TITLE: Follow-up after post-exposure prophylaxis before and during the COVID-  
2 19 pandemic in Brazil

3

4 RUNNING TITLE: Adherence to serological follow-up in PEP

5

6 KEYWORDS

7 HIV-1, post-exposure prophylaxis, HIV Testing, Occupational Exposure,  
8 Treatment Adherence and Compliance

9

10 AUTHORS:

11 Elaine Monteiro Matsuda<sup>1</sup>,  
12 elainematsuda@gmail.com, <https://orcid.org/0000-0002-0254-4154>

13  
14 Ivana Barros de Campos<sup>2</sup>,  
15 ivanacamp@gmail.com, <https://orcid.org/0000-0003-0334-0572>

16  
17 Luís Fernando de Macedo Brígido<sup>3</sup>,  
18 lubrigido@gmail.com, <https://orcid.org/0000-0002-1022-7837>

19

20 <sup>1</sup>Secretaria da Saúde de Santo André. Santo André, São Paulo, Brasil

21 <sup>2</sup>Instituto Adolfo Lutz. Centro Regional de Santo André. Santo André, São Paulo, Brasil

22 <sup>3</sup>Instituto Adolfo Lutz. Centro de Virologia. São Paulo, São Paulo, Brasil

23

24 ABSTRACT

25 Although post-exposure prophylaxis (PEP) is a powerful tool to abort HIV  
26 infection within 72 hours of exposure, blocking the establishment of chronic  
27 infection, follow-up metrics of this intervention are scarce. As antiretroviral use  
28 delays diagnosis biomarkers, the moment to perform serological evaluations  
29 must be considered this to avoid missed diagnosis opportunities. We assessed  
30 the return adherence after PEP dispensation in service in the Sao Paulo  
31 metropolitan area and reviewed the literature, both showing limited adherence  
32 to current protocols and leading to difficulties in diagnosing early HIV infection.  
33 The current proposed date for the first return after PEP is associated with low  
34 adherence and may have limited capability to detect antibodies if the infection is  
35 present. Guidelines should allow a longer time after PEP discontinuation along  
36 with message reminders to encourage adherence and avoid false negative  
37 results that can be detrimental both to the patient and to the community.

## 38 INTRODUCTION

39 The Joint United Nations Programme on HIV/AIDS (UNAIDS) leads and  
40 inspires the world to achieve its shared vision of zero new HIV infections, zero  
41 discrimination, and zero AIDS-related deaths. Since 2010, new HIV infections  
42 have declined by 32%, from 2.2 million to 1.5 million in 2021<sup>1</sup>.

43 Combination prevention programs include a mix of evidence-based biomedical,  
44 behavioral, and structural interventions to meet the current HIV prevention  
45 needs of individuals and communities, aiming for the greatest possible impact  
46 on reducing the number of people newly infected<sup>2</sup>. They must be appropriate to  
47 each individual's circumstances and HIV vulnerability<sup>3</sup>. Globally, gay men and  
48 other men who have sex with men are 28 times more likely to be infected with  
49 HIV. People who inject drugs have 35 times the risk, sex workers 30 times, and  
50 transgender women 14 times the risk<sup>1</sup>.

51 Antiretrovirals can provide not only treatment but also act as a preventive  
52 intervention through viral suppression that makes the individual undetectable =  
53 untransmissible<sup>4</sup>. Moreover, antiretroviral has been shown to be effective in pre-  
54 exposure prophylaxis (PrEP)<sup>5</sup> and post-exposure (PEP)<sup>6,7</sup> and is part of the  
55 main core of strategies for controlling the HIV epidemic<sup>8</sup>. The preferred regimen  
56 to the first line of treatment in Brazil is the same as that used for PEP and  
57 consists of tenofovir 300mg/lamivudine 300mg (TDF/3TC) associated with  
58 dolutegravir 50mg (DTG) daily<sup>9</sup>.

59 Brazilian as well as other guidelines recommend PEP with 3 drugs, prescribed  
60 after a point-of-care serological HIV test and dispensed for 28 days. PEP is  
61 recommended only within 72 hours of exposure, with guidance to repeat the  
62 HIV test<sup>9,10,11,12,13</sup>. The timing of this follow-up testing varies between four to six  
63 weeks and 12 weeks after exposure<sup>9,10</sup>, at the end of PEP and 10 to 12 weeks  
64 after exposure<sup>12</sup>, at a minimum of 45 days after completion of the PEP course, if  
65 the 28-day PEP course is completed, this is 73 days (10.5 weeks) post  
66 exposure<sup>11</sup>, and at 3 months after exposure<sup>13</sup>. CDC (USA) and the UK  
67 recommend the use of a fourth-generation test at the beginning of PEP, and if  
68 not used, the CDC recommends an additional serological follow-up 6 months  
69 after exposure<sup>10,11</sup>. The seroreactivity of the rapid test depends on the

70 sensitivity of the test in relation to previous exposures (immunological window).  
71 The fourth-generation rapid test is more efficient in detecting very recent  
72 infections, even detecting antibodies not detected in the third-generation rapid  
73 test, as well as acute infection with the detection of the p24 antigen<sup>14</sup>.

74 The efficacy of PEP depends on the timing and proper use of the regimen.  
75 Delayed initiation of PEP, poor/non-adherence to the regimen, especially in the  
76 first days, and further high-risk sexual exposures after cessation of PEP may  
77 compromise the outcome. Moreover, early/primary HIV infection already  
78 established at the time of PEP initiation is a possibility in many situations<sup>11</sup>.  
79 Diagnosis of acute/early HIV infection, proper adherence to PEP protocols, as  
80 well as, laboratory follow-up are constant challenges to this policy<sup>9,10,11,15,16</sup>.

81 To evaluate the issue of post-PEP serological monitoring we carried out this  
82 study in a reference service that cares for people living with HIV and provides  
83 antiretroviral prophylaxis, PEP, and PrEP, to those who seek it spontaneously  
84 or were referred from other services, in Santo André, a metropolitan area of São  
85 Paulo/Brazil.

86

## 87 METHODOLOGY

88 The Medication Logistic Control System (SICLOM) provided information on  
89 users with PEP dispensation between 2019 and 2021. Medical records were  
90 consulted in order to assess adherence to the recommended 30 and 120-day  
91 returns after risk exposure and other variables such as sex (female or male),  
92 gender (cis or transgender), men who have sex with men (MSM), sex worker  
93 (yes or not) and category of risk exposure (biological material exposition,  
94 occupational or not, sexual consent or not and others). Return after starting  
95 PEP between 26 and 40 days was considered for this study as a 30-day return  
96 and between 110 and 130 days as a 120-day return. Return on any date within  
97 180 days was also evaluated.

98 Data obtained from electronic databases were anonymized before analysis.  
99 Statistical analyzes were performed with Stata version 14.2 (Stata Corp LLC,  
100 College Station, Texas, USA) and IBM SPSS Statistics for Windows, Version

101 24.0. (Armonk, NY, USA). The age (years) was expressed in medians, with the  
102 25th and 75th percentiles (IQR). A significant level of  $p < 0.05$ , two-tailed, was  
103 applied to all analyses. Variables were compared using Mann-Whitney or  
104 Kruskal-Wallis test for continuous variables and chi-squared ( $\chi^2$ ) or Fisher's  
105 exact tests for categorical variables, as appropriate.

106

## 107 RESULTS

108 During the study period, we obtained 2168 PEP events recorded at SICLOM,  
109 dispensed for 1468 users. Additional information could be obtained only from  
110 1281/1468 users. The median age of these users was 31 years (IQR25-75 24-  
111 39), with 6/1281 0.3% being under 14 years and 17/1281 0.8% above 60 years.

112 Table 1 describes demographic characteristics by year of study. Most were  
113 male (853/1281 67%), with 368/853 43% of this reporting being MSM, 39/853  
114 4.6% identified as transgender women (TW), which corresponds to 27/931 2.9%  
115 among all users. Almost all TW were sex workers, 90% 35/39 versus 2.4%  
116 29/1207 among ciswomen ( $p < 0.0001$ ). Among cisgender, the proportion of sex  
117 workers among women was higher than among men, 5.4% 23/428 versus 0.7%  
118 6/808 ( $p < 0.0001$ ).

119 We verified a change in the profile of PEP users who sought the service, still  
120 young adults, but with increasing age, with a median of 30, 31, and 32 years, in  
121 2019, 2020, and 2021, respectively ( $p = 0.02$ ) and a proportional increase of  
122 women 31%, 28% and 51% ( $p < 0.0001$ ), which may be due in part to the  
123 increase of occupational accidents during the study period 27%, 33% and 53%,  
124 mostly women 70%, 74%, 76%.

125 Information regarding the category of risk exposure that motivated the search  
126 for PEP referred to in the medical records and in which group (female sex,  
127 MSM, TW, and/or sex worker) are summarized in Table 2.

128 Table 3 demonstrates adherence to returns of 30 and 120 days isolated and  
129 associated, and any time up to 180 days. There was a reduction in returns at  
130 any time after PEP during the COVID-19 pandemic, from 39.5% in 2019 to

131 12.8% (2020) and 20.2% (2021), ( $p < 0.001$ ). The adherence to the 30-day return  
132 was also smaller in the years 2020 and 2021 compared to the year 2019  
133 ( $p = 0.0001$ ). However, from 2019 to 2021, if we analyze the 30-day versus 120-  
134 day returns separately, the adherence was greater in the 30-day return,  
135 315/1281 24,6% versus 103/1281 8% ( $p < 0.0001$ ).

136

## 137 DISCUSSION

138 PEP is an efficacious HIV prevention option that has been underutilized,  
139 representing a missed opportunity to prevent or abort HIV infection associated  
140 with high-risk exposures<sup>10,17,18</sup>.

141 Ruling out acute HIV infection prior to prophylactic antiretroviral use is  
142 particularly challenging in low- and middle-income settings, where there is  
143 limited access to advanced laboratory testing and infrastructure<sup>15</sup>. As the 3-drug  
144 PEP regimen is the same as that used in first-line treatment  
145 (tenofovir/lamivudine + dolutegravir), when the HIV infection is not blocked by  
146 PEP (viral infection is established), or starting PEP in a patient in the  
147 acute/early phase, both cases, will be on early therapy. This very early  
148 treatment has been suggested as potentially beneficial to the patient<sup>19,20</sup> and  
149 avoids further viral transmission at this highly infectious phase<sup>20,21</sup>. However,  
150 recognition of infection is cumbersome at this stage, and several studies  
151 demonstrate a delay in seroconversion and viremia detection of HIV-1, due to  
152 the use of antiretroviral drugs, preventing proper use of serological and other  
153 biomarkers of infection<sup>15,16</sup>. This increases the probability of negative false  
154 results in HIV testing, allowing an undiagnosed patient to return to the  
155 community with an uncontrolled viremia. Better diagnosis approaches to this  
156 situation are clearly needed. This delay in seroconversion becomes even more  
157 worrying in cases where PrEP is prescribed, in which the two-drug scheme  
158 used in PrEP will be a sub-optimal treatment regimen that, as a consequence of  
159 an undocumented infection, implies the risk of inducing resistance mutations  
160 and virological failure<sup>22</sup>.

161 Manak et al. evaluated the performance of HIV antigen/antibody combination at  
162 weeks 12 and 24 following the initiation of antiretroviral therapy (ART) at Fiebig  
163 stage I (FI), FII, or FIII/IV in comparison to samples from untreated cases, who  
164 demonstrated robust reactivity, while 52.2% of samples from individuals  
165 initiating ART at FI, 7.7% at FII, and 4.5% at FIII/IV were nonreactive by the HIV  
166 Ag/Ab Combo assays<sup>16</sup>. Although the first evaluation in the use of ART was at  
167 12 weeks, it would be expected that there would also be this delay with 4 weeks  
168 of the use PEP or PrEP.

169 While excellent, well-tolerated treatment regimens are available, adherence to  
170 PEP medications and attendance at clinical visits may be sub-optimal in certain  
171 groups of individuals<sup>8</sup>. In an Australian cohort of mainly MSM, only 34% of 1864  
172 had follow-up testing at 12 weeks after initiation of PEP<sup>23</sup>. Several studies in the  
173 UK report that attendance at the 12-week follow-up HIV test is poor (30–67%)<sup>11</sup>.

174 In our service, the first year of the COVID-19 pandemic, assistance to PEP  
175 cases was slightly lower compared to 2019 (-4%), with a 10% decrease in 2021  
176 compared to 2020<sup>24</sup>. The recommended follow-up routine testing was 30 and  
177 120 days after starting PEP. However, in 2020, with the limitations imposed by  
178 the COVID-19 pandemic, a self-test was requested to be carried out in 30 days  
179 and a return to the service only in 120 days. Despite this guidance, the 30-day  
180 return occurred, showing a greater adherence than the 120-day return. Even  
181 before the pandemic, we found that adherence to the 120-day return (12.2%)  
182 was very low and worse than in other studies<sup>11</sup>, perhaps due to the fact that an  
183 only approximate return date of 30 days was provided and, in case of absence,  
184 the user had no other suggested date to return. Even in cases where a later,  
185 (e.g. 120 days) return is emphasized, the patient may feel that the 30-day  
186 evaluation is sufficient, disregarding further follow-up. In view of this and the  
187 possibility of delay in seroconversion, in 2023 we started to orient the first return  
188 within 45 days after the start of the PEP (the current limit for the first return  
189 according to the Brazilian guideline)<sup>9</sup> and, if unable to attend, the return within 4  
190 months, both with approximate dates. The UK guideline seems more coherent  
191 to this view when considering the delay of a possible seroconversion using  
192 antiretrovirals, as it waits at a minimum of 45 days after completion of the PEP

193 course. If the 28-day PEP course is completed, this is 73 days (10.5 weeks)  
194 post-exposure<sup>11</sup>.

195 By evaluating the adherence of those who sought the service and obtained PEP  
196 release, we intend to propose a more feasible returns scheme that makes it  
197 possible to reduce the loss of opportunities for proper HIV infection diagnosis in  
198 these individuals that used PEP, avoiding missed diagnosis due to PEP  
199 suppression of biomarkers of infection.

200 In conclusion, the PEP return protocol in 30 and 120 days did not seem  
201 adequate with low adherence at all dates. As the highest adherence is still  
202 verified in the first follow-up, very close to the end of the PEP, testing only at  
203 this time may increase the chances of false negative results. The second return  
204 in 120 days seems very distant from the event, and the user may not return. It is  
205 of paramount importance in this scenario to identify a new infection if present  
206 and offer proper treatment and consequently break the chain of transmission.  
207 We strongly suggest the incorporation of some recommendations of the UK  
208 Guideline which suggests that services use local mechanisms, including  
209 text/email reminders, to encourage adherence to post-exposure HIV testing<sup>11</sup>.  
210 Studies are needed to define a better time that can reconcile test capabilities to  
211 detect infection to greater adherence. Strategies to identify infections occurring  
212 before or during PEP need to be implemented to avoid discontinuation of a PEP  
213 regimen that can be providing viral control and potentially favor future cure  
214 strategies.

215

## 216 REFERENCES

- 217 1. UNAIDS. Global HIV & AIDS statistics — Fact sheet. 2022; Available from:  
218 <https://www.unaids.org/en/resources/fact-sheet>; Accessed on 05/13/2023  
219
- 220 2. Global AIDS Strategy 2021–2026. End Inequalities. End AIDS. Geneva:  
221 Joint United Nations Programme on HIV/AIDS; 2021. Available from:  
222 [https://www.unaids.org/en/resources/documents/2021/2021-2026-global-](https://www.unaids.org/en/resources/documents/2021/2021-2026-global-AIDS-strategy)  
223 [AIDS-strategy](https://www.unaids.org/en/resources/documents/2021/2021-2026-global-AIDS-strategy). Accessed on 05/13/2023  
224
- 225 3. Godfrey-Faussett P, Frescura L, Abdool Karim Q, Clayton M, Ghys PD; (on  
226 behalf of the 2025 prevention targets working group). HIV prevention for the

- 227 next decade: Appropriate, person-centred, prioritised, effective, combination  
228 prevention. *PLoS Med.* 2022;19(9):e1004102.  
229 <https://doi.org/10.1371/journal.pmed.1004102>. Erratum in: *PLoS Med.*  
230 2022;19(11):e1004131. <https://doi.org/10.1371/journal.pmed.1004131>  
231
- 232 4. Rodger AJ, Cambiano V, Bruun T, Vernazza P, Collins S, Degen O,  
233 PARTNER Study Group. Risk of HIV transmission through condomless sex  
234 in serodifferent gay couples with the HIV-positive partner taking suppressive  
235 antiretroviral therapy (PARTNER): final results of a multicentre, prospective,  
236 observational study. *Lancet.* 2019;393:2428-2438.  
237 [https://doi.org/10.1016/S0140-6736\(19\)30418-0](https://doi.org/10.1016/S0140-6736(19)30418-0)  
238
- 239 5. Anderson PL, Glidden D V, Liu A, Buchbinder S, Lama JR, Guanira JV, et  
240 al. Emtricitabine-tenofovir concentrations and pre-exposure prophylaxis  
241 efficacy in men who have sex with men. *Sci Transl Med.* 2012; 4(151):151–  
242 125. <https://doi.org/10.1126/scitranslmed.3004006>  
243
- 244 6. Cardo DM, Culver DH, Ciesielski CA, Srivastava PU, Marcus R, Abiteboul  
245 D, et al. A Case– Control Study of HIV Seroconversion in Health Care  
246 Workers after Percutaneous Exposure. *New England Journal of Medicine.*  
247 1997; 337:1485–1490. <https://doi.org/10.1056/NEJM199711203372101>  
248
- 249 7. Gokengin D, Bursa D, Skrzat-Klapaczynska A, Alexiev I, Arsikj E, Balayan  
250 T, Begovac J, Cicic A, Dragovic G, Harxhi A, Aimla K, Lakatos B,  
251 Matulionyte R, Mulabdic V, Oprea C, Papadopoulos A, Rukhadze N,  
252 Sedlacek D, Sojak L, Tomazic J, Vassilenko A, Vasylyev M, Verhaz A,  
253 Yancheva N, Yurin O, Kowalska J; Euroguidelines in Central and Eastern  
254 Europe (ECEE) Network Group. PrEP Scale-Up and PEP in Central and  
255 Eastern Europe: Changes in Time and the Challenges We Face with No  
256 Expected HIV Vaccine in the near Future. *Vaccines (Basel).*  
257 2023;11(1):122. <https://doi.org/10.3390/vaccines11010122>  
258
- 259 8. Krakower DS, Jain S, Mayer KH. Antiretrovirals for primary HIV prevention:  
260 the current status of pre- and post-exposure prophylaxis. *Curr HIV/AIDS*  
261 *Rep.* 2015;12(1):127-38. <https://doi.org/10.1007/s11904-014-0253>  
262
- 263 9. Ministério da Saúde (BR), Secretaria de Vigilância em Saúde,  
264 Departamento de HIV/Aids, Tuberculose, Hepatites Virais e Infecções  
265 Sexualmente Transmissíveis. Protocolo Clínico e Diretrizes Terapêuticas  
266 para Profilaxia Pós-Exposição (PEP) de Risco à Infecção pelo HIV, IST e  
267 Hepatites Virais. Updated on 07/29/2022. Available from:  
268 [https://www.gov.br/aids/pt-br/centrais-de-conteudo/pcdts/2021/hiv-](https://www.gov.br/aids/pt-br/centrais-de-conteudo/pcdts/2021/hiv-aids/prot_clinico_diretrizes_terap_peg_risco_infeccao_hiv_ist_hv_2021.pdf/view)  
269 [aids/prot\\_clinico\\_diretrizes\\_terap\\_peg\\_-](https://www.gov.br/aids/pt-br/centrais-de-conteudo/pcdts/2021/hiv-aids/prot_clinico_diretrizes_terap_peg_risco_infeccao_hiv_ist_hv_2021.pdf/view)  
270 [risco\\_infeccao\\_hiv\\_ist\\_hv\\_2021.pdf/view](https://www.gov.br/aids/pt-br/centrais-de-conteudo/pcdts/2021/hiv-aids/prot_clinico_diretrizes_terap_peg_risco_infeccao_hiv_ist_hv_2021.pdf/view). Accessed on 05/13/2023  
271



- 272 10. Centers for Disease Control and Prevention, U.S. Department of Health and  
273 Human Services. Updated Guidelines for Antiretroviral Postexposure  
274 Prophylaxis After Sexual, Injection-Drug Use, or Other Nonoccupational  
275 Exposure to HIV—United States, 2016. Available from:  
276 <https://www.cdc.gov/hiv/pdf/programresources/cdc-hiv-npep-guidelines.pdf>.  
277 Accessed on 05/13/2023  
278
- 279 11. Cresswell F, Asanati K, Bhagani S, Boffito M, Delpech V, Ellis J, Fox J,  
280 Furness L, Kingston M, Mansouri M, Samarawickrama A, Smithson K,  
281 Sparrowhawk A, Rafferty P, Roper T, Waters L, Rodger A, Gupta N. UK  
282 guideline for the use of HIV post-exposure prophylaxis 2021. *HIV Med.*  
283 2022;23(5):494-545. <https://doi.org/10.1111/hiv.13208>. Erratum in: *HIV*  
284 *Med.* 2022 Jul;23(6):701. <https://doi.org/10.1111/hiv.13327>  
285
- 286 12. European AIDS Clinical Society (EACS) Guidelines. Post-exposure  
287 Prophylaxis (PEP). Available from: [https://eacs.sanfordguide.com/art/post-](https://eacs.sanfordguide.com/art/post-exposure-prophylaxis)  
288 [exposure-prophylaxis](https://eacs.sanfordguide.com/art/post-exposure-prophylaxis). Accessed on 05/13/2023  
289
- 290 13. World Health Organization. Guidelines on post-exposure prophylaxis for  
291 HIV and the use of co-trimoxazole prophylaxis for HIV-related infections  
292 among adults, adolescents and children: recommendations for a public  
293 health approach: December 2014 supplement to the 2013 consolidated  
294 guidelines on the use of antiretroviral drugs for treating and preventing HIV  
295 infection. 2014 Available from:  
296 <https://apps.who.int/iris/handle/10665/145719>. Accessed on 05/13/2023  
297
- 298 14. Matsuda EM, Ahagon CM, Coelho LPO, Campos IB, Colpas DR, Campos  
299 NC, López-Lopes GIS, Silva VO, de Oliveira IP, Brígido LFM. A simple  
300 algorithm for selecting cases to investigate acute and early HIV infections in  
301 low- and middle-income countries. *J Med Virol.* 2022;94(2):791-794.  
302 <https://doi.org/10.1002/jmv.27398>  
303
- 304 15. Elliott T, Sanders EJ, Doherty M, Ndung'u T, Cohen M, Patel P, Cairns G,  
305 Rutstein SE, Ananworanich J, Brown C, Fidler S. Challenges of HIV  
306 diagnosis and management in the context of pre-exposure prophylaxis  
307 (PrEP), post-exposure prophylaxis (PEP), test and start and acute HIV  
308 infection: a scoping review. *J Int AIDS Soc.* 2019;22(12):e25419.  
309 <https://doi.org/10.1002/jia2.25419>  
310
- 311 16. Manak MM, Jagodzinski LL, Shutt A, Malia JA, Leos M, Ouellette J,  
312 Akapirat S, Colby DL, Phanuphak N, Eller LA, Robb ML, de Souza M,  
313 Ananworanich J, Peel SA; RV254/SEARCH010 and the RV217 Study  
314 Teams. Decreased Seroreactivity in Individuals Initiating Antiretroviral  
315 Therapy during Acute HIV Infection. *J Clin Microbiol.* 2019;57(10):e00757-  
316 19. <https://doi.org/10.1128/JCM.00757-19>  
317

- 318 17. Ayieko J, Petersen ML, Kanya MR, Havlir DV. PEP for HIV prevention: are  
319 we missing opportunities to reduce new infections? *J Int AIDS Soc.* 2022  
320 May;25(5):e25942. <https://doi.org/10.1002/jia2.25942>  
321
- 322 18. Puro V, Calcagno G, Anselmo M, Benvenuto G, Trabattoni D, Clerici M,  
323 Ippolito G. Transient detection of plasma HIV-1 RNA during postexposure  
324 prophylaxis. *Infect Control Hosp Epidemiol.* 2000;21(8):529-31.  
325 <https://doi.org/10.1086/501801>  
326
- 327 19. Chen J, Ramendra R, Lu H, Routy JP. The early bird gets the worm:  
328 benefits and future directions with early antiretroviral therapy initiation in  
329 primary HIV infection. *Future Medicine Ltd; Future Virology.*  
330 2018;13(11):779-786. <https://doi.org/10.2217/fvl-2018-0110>  
331
- 332 20. Takata H, Kakazu JC, Mitchell JL, Kroon E, Colby DJ, Sacdalan C, Bai H,  
333 Ehrenberg PK, Geretz A, Buranapraditkun S, Pinyakorn S, Intasan J,  
334 Tipsuk S, Suttichom D, Prueksakaew P, Chalermchai T, Chomchey N,  
335 Phanuphak N, de Souza M, Michael NL, Robb ML, Haddad EK, Crowell TA,  
336 Vasan S, Valcour VG, Douek DC, Thomas R, Rolland M, Chomont N,  
337 Ananworanich J, Trautmann L; RV254/SEARCH010, RV304/ SEARCH013,  
338 and SEARCH011 study groups. Long-term antiretroviral therapy initiated in  
339 acute HIV infection prevents residual dysfunction of HIV-specific CD8<sup>+</sup> T  
340 cells. *EBioMedicine.* 2022;84:104253.  
341 <https://doi.org/10.1016/j.ebiom.2022.104253>  
342
- 343 21. Cohen MS, Shaw GM, McMichael AJ, Haynes BF. Acute HIV-1 Infection. *N*  
344 *Engl J Med.* 2011;364(20):1943-54.  
345 <https://doi.org/10.1056/NEJMra1011874>  
346
- 347 22. Celum CL, Bukusi EA, Bekker LG, Delany-Moretlwe S, Kidoguchi L, Omollo  
348 V, Rousseau E, Travill D, Morton JF, Mogaka F, O'Malley G, Barnabee G,  
349 van der Straten A, Donnell D, Parikh UM, Kudrick L, Anderson PL, Haberer  
350 JE, Wu L, Heffron R, Johnson R, Morrison S, Baeten JM; POWER Study  
351 Team. PrEP use and HIV seroconversion rates in adolescent girls and  
352 young women from Kenya and South Africa: the POWER demonstration  
353 project. *J Int AIDS Soc.* 2022;25(7):e25962.  
354 <https://doi.org/10.1002/jia2.25962>  
355
- 356 23. Armishaw J, Hoy JF, Watson KM, Wright EJ, Price BG, Pierce AB. Non-  
357 occupational post-exposure prophylaxis in Victoria, Australia: responding to  
358 high rates of re-presentation and low rates of follow-up. *Int J STD AIDS.*  
359 2011;22(12):714-8. <https://doi.org/10.1258/ijsa.2011.011174>  
360
- 361 24. Matsuda EM, Oliveira IP, Bao LB, Manzoni FM, Campos NC, Varejão BB,  
362 Leal MP, Nascimento VB, Brígido LFM. Impact of covid-19 on people living

363 with HIV-1: care and prevention indicators at a local and nationwide level,  
364 Santo André, Brazil. Rev Saude Publica. 2022;56:37.  
365 <https://doi.org/10.11606/s1518-8787.2022056004314>  
366

367

Table 1 – Demographic characteristics among cases with the dispensation of post-exposure prophylaxis in each year of the study

|               | ALL                    | 2019              | 2020              | 2021              | p      |
|---------------|------------------------|-------------------|-------------------|-------------------|--------|
| N             | 1281                   | 636 (49.6%)       | 422 (32.9%)       | 223 (17.4%)       | 1      |
| Age (n years) | 31<br>(IQR25-75 24-39) | 30<br>(IQR 23-38) | 31<br>(IQR 25-38) | 32<br>(IQR 25-41) | 0.02   |
| Female        | 428/1281<br>33.4%      | 199/636<br>31.3%  | 116/422<br>27.5%  | 113/223<br>50.7%  | 0.0001 |
| Male          | 853/1281<br>66.6%      | 437/636<br>68.7%  | 306/422<br>72.5%  | 110/223<br>49.3%  |        |
| MSM           | 368/853<br>43.1%       | 198/437<br>45,3%  | 127/306<br>41,5%  | 43/110<br>39,1%   | 0.36   |
| Transwoman    | 39/853<br>4.6%         | 20/437<br>4,58%   | 13/306<br>4,25%   | 6/110<br>5,46%    | 0.87   |
| Sex workers   | 64/1275<br>5%          | 42/631<br>6.7%    | 17/422<br>4%      | 5/222<br>2.3%     | 0.02   |

MSM, man who have sex with man

Table 2 – Type of risk exposure for HIV infection that motivated the dispensation of post-exposure prophylaxis in the different risk exposure categories and in each year of the study

|                                   | ALL<br>n=1276                                                                                                   | 2019<br>635/1281 (49.6%)                                                                                        | 2020<br>419/1281 (32.9%)                                                                                     | 2021<br>222/1281 (17.4%)                                                                              |
|-----------------------------------|-----------------------------------------------------------------------------------------------------------------|-----------------------------------------------------------------------------------------------------------------|--------------------------------------------------------------------------------------------------------------|-------------------------------------------------------------------------------------------------------|
| Accident with biological material |                                                                                                                 |                                                                                                                 |                                                                                                              |                                                                                                       |
| Occupational                      | 389/1276 30.5%<br>283/389 72.8% female<br>0 MSM<br>0 TW<br>0 sex worker                                         | 169/635 26.91%<br>118/169 69.8% female<br>0 MSM<br>0 TW<br>0 sex worker                                         | 103/419 32.7%<br>76/103 73.8% female<br>0 MSM<br>0 TW<br>0 sex worker                                        | 117/222 52.7%<br>89/117 76.1% female<br>0 MSM<br>0 TW<br>0 sex worker                                 |
| Non-occupational                  | 12/1276 0.9%<br>6/12 50% female<br>2/6 33.4% male MSM<br>0 TW<br>0 sex worker                                   | 6/635 0.9%<br>3/6 female 50%<br>1/3 33.4% male MSM<br>0 TW<br>0 sex worker                                      | 5/419 1.2%<br>2/5 female 40%<br>1/3 33.4% male MSM<br>0 TW<br>0 sex worker                                   | 1/222 0.5 %<br>1/1 female 100%<br>0 MSM<br>0 TW<br>0 sex worker                                       |
| Sexual                            |                                                                                                                 |                                                                                                                 |                                                                                                              |                                                                                                       |
| Sexual Consent                    | 831/1276 65.1%<br>101/831 12% female<br>364/730 49.9% male MSM<br>39/730 5.3% male TW<br>64/830 7.7% sex worker | 436/635 68.7%<br>60/436 13.8% female<br>196/376 52.1% male MSM<br>20/376 5.3% male TW<br>42/436 9.6% sex worker | 300/419 71.6%<br>27/300 9% female<br>125/273 45.8% male MSM<br>13/273 4.8% male TW<br>17/300 5.7% sex worker | 95/222 42.8%<br>14/95 14.8% female<br>43/81 53% male MSM<br>6/81 7.4% male TW<br>5/94 5.3% sex worker |
| Sexual Assault                    | 38/1276 2.98%<br>36/38 94.7% female<br>1/2 50% male MSM<br>0 TW<br>0 sex worker                                 | 18/635 2.83%<br>17/18 94.5% female<br>0 MSM<br>0 TW<br>0 sex worker                                             | 11/419 2.6%<br>10/11 90.9% female<br>1/1 100% male MSM<br>0 TW<br>0 sex worker                               | 9/222 4.1%<br>9/9 100% female<br>0 MSM<br>0 TW<br>0 sex worker                                        |
| Other                             | 6/1276 0.47 %<br>1/6 16.7% female<br>1/5 20% male MSM<br>0 TW<br>0 sex worker                                   | 6/635 0.94%<br>1/6 16.7% female<br>1/5 20% male MSM<br>0 TW<br>0 sex worker                                     | 0                                                                                                            | 0                                                                                                     |

370 MSM, man who have sex with man; TW, transgender woman

71

Table 3 - Adherence to the 30 and 120-day returns, isolated and in different associations, or at any time within 180 days after exposure to risk for HIV infection

| Adherence                                                         |            | ALL              | 2019             | 2020             | 2021             | p                |
|-------------------------------------------------------------------|------------|------------------|------------------|------------------|------------------|------------------|
| 30-day return                                                     | <b>yes</b> | <b>315 24.6%</b> | <b>230 36.3%</b> | <b>45 10.7%</b>  | <b>38 17%</b>    | <b>0.0001</b>    |
|                                                                   | no         | 966 75.4%        | 404 63.7%        | 377 54.7%        | 185 83%          |                  |
| Return between 30 and 120 days, median of 57days (IQR25-75 43-67) | <b>yes</b> | <b>79 6.2%</b>   | <b>60 9.4%</b>   | <b>9 2.1%</b>    | <b>10 4.5%</b>   | <b>0.12</b>      |
|                                                                   | no         | 1202 93.8%       | 576 90.6%        | 413 97.9%        | 213 95.5%        |                  |
| 120-day return                                                    | <b>yes</b> | <b>103 8%</b>    | <b>77 12.2%</b>  | <b>13 3.1%</b>   | <b>12 5.4%</b>   | <b>0.03</b>      |
|                                                                   | no         | 1178 92%         | 557 87.8%        | 409 96.9%        | 211 94.6%        |                  |
| Return of 30 and 120 days                                         | <b>yes</b> | <b>65 5.1%</b>   | <b>56 8.8%</b>   | <b>4 0.9%</b>    | <b>5 2.2%</b>    | <b>0.07</b>      |
|                                                                   | no         | 1216 94.9%       | 580 8.8%         | 418 99.1%        | 218 97.8%        |                  |
| Return 30 and absence 120 days                                    | <b>yes</b> | <b>247 19.3%</b> | <b>173 27.2%</b> | <b>41 9.7%</b>   | <b>33 14.8%</b>  | <b>0.0001</b>    |
|                                                                   | no         | 1034 80.7%       | 463 72.8%        | 381 90.3%        | 190 85.2%        |                  |
| Absence in 30 and return in 120                                   | <b>yes</b> | <b>37 2.9%</b>   | <b>21 2.6%</b>   | <b>9 2.1%</b>    | <b>7 3.1%</b>    | <b>0.95</b>      |
|                                                                   | no         | 1244 97.1%       | 615 96.7%        | 413 97.9%        | 96.90%           |                  |
| Absence in 30 and return 120 days                                 | <b>yes</b> | <b>931 72.7%</b> | <b>385 60.5%</b> | <b>368 87.2%</b> | <b>178 79.8%</b> | <b>0.0001</b>    |
|                                                                   | no         | 350 16.1%        | 251 39.5%        | 54 12.8%         | 45 20.2%         |                  |
| Return at any time                                                | <b>yes</b> | <b>350 27.3%</b> | <b>251 39.5%</b> | <b>54 12.8%</b>  | <b>45 20.2%</b>  | <b>&lt;0.001</b> |
|                                                                   | no         | 931 72.7%        | 385 60.5%        | 368 87.3%        | 178 79.8%        |                  |

72

73
